# Supplementary material for: A module to convert spectral to narrowband snow albedo for use in climate models: SNOWBAL v1.2
Source: Copernicus journal article supplement (doi:10.5194/gmd-12-5157-2019), 2019-12-11
Supplement: Supplementary file 1 [file gmd-12-5157-2019-supplement.zip]

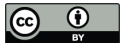

## *Supplement of*

# **A module to convert spectral to narrowband snow albedo for use in climate models: SNOWBAL v1.2**

**Christiaan T. van Dalum et al.**

*Correspondence to:* Christiaan T. van Dalum (c.t.vandalum@uu.nl)

- gmd-12-5157-2019-supplement-title-page.pdf
- scripts
  - .DS\_Store
  - SNOWBAL\_manual.pdf
  - albedo\_TARTES\_sza53.0.ALB
  - libradtran\_templates
    - \* .DS\_Store
    - \* IC.DAT
    - \* WC\_large.DAT
    - \* WC\_small.DAT
    - \* rad\_per\_sza\_template\_clouds.INP
  - snowbal1\_2.py
  - time\_series.py

The copyright of individual parts of the supplement might differ from the CC BY 4.0 License.
