# Supplementary material for: A module to convert spectral to narrowband snow albedo for use in climate models: SNOWBAL v1.2
Source: Copernicus journal article supplement (doi:10.5194/gmd-12-5157-2019), 2019-12-11
Supplement: Supplementary file 2 [file gmd-12-5157-2019-supplement.zip]

**snowbal1\_2.py****Introduction and Purpose**

The SNOWBAL module (snowbal1\_2.py) is a Python script to determine the representative wavelength for wavelength bands and water vapour, liquid water content and/or ice water content for given conditions, e.g. snow density, impurities, specific surface area, using TARTES and DISORT. The module is further described and its output analyzed in Van Dalum et al. (2019). The script is built in Python2.7, but should also be compatible with Python3.7.

The SNOWBAL module also includes the creation of the required input files for Libradtran using the provided templates, and running Libradtran using the created input files. The wavelengths and fluxes in the Libradtran output are loaded and used as weights. Then the spectral albedo is calculated using TARTES, which has to be installed in the current working directory. The spectral albedo is converted to a broadband albedo using the Libradtran spectral fluxes as weights. The broadband albedo corresponds to a wavelength for which TARTES would produce this albedo, which is called the representative wavelength. Further corrections are applied before the representative wavelengths are saved into a text file for clear-sky direct radiation, clear-sky diffuse radiation, and cloudy diffuse radiation. The fraction of incoming radiation that is direct is also computed. More information about the steps taken is found in the code.

**Packages**

tartes, including impurities module  
os.path  
numpy  
shutil

**Input parameters**

Default values of all parameters are found in the code.

| Name                | Description                                                                                                                                                    |
|---------------------|----------------------------------------------------------------------------------------------------------------------------------------------------------------|
| savendir            | Directory to save the results                                                                                                                                  |
| libradtran_base     | Base directory of Libradtran data                                                                                                                              |
| basename            | Base name of the input and output files, beyond "=" is the angle to be considered                                                                              |
| libradtrantemplate  | Libradtran input template name                                                                                                                                 |
| alb_file_location   | Location of the albedo file that is used for DISORT. An example file has been added, which is created with TARTES, but other albedo files can be used as well. |
| alb_file_name       | Base name of the albedo file                                                                                                                                   |
| iwplist             | IWP, ice water path list, multiple values are allowed                                                                                                          |
| lwplist             | LWP, liquid water path list, multiple values are allowed                                                                                                       |
| PWlist              | PW, precipitable water list, multiple values are allowed                                                                                                       |
| sza                 | Solar zenith angle                                                                                                                                             |
| cloudyangle         | Angle to use to compute the representative wavelength for cloudy conditions.                                                                                   |
| spectralintervalsnm | Spectral intervals to consider in nanometers (default 12 spectral intervals)                                                                                   |
| ssa                 | Specific surface area of each snow layer                                                                                                                       |
| density             | Snow density of each snow layer                                                                                                                                |
| thickness           | Snow layer thickness                                                                                                                                           |

|                   |                                                                                                                                      |
|-------------------|--------------------------------------------------------------------------------------------------------------------------------------|
| impurity_type     | Impurity types to consider, for no impurities choose "", for soot: Soot, for hulis: HULIS                                            |
| impurities        | Impurity concentration in g/g in each layer, 0.0 is a valid option.                                                                  |
| makingfiles       | Switch: 1 if Libradtran input files making is on, 0 if off.                                                                          |
| runninglibradtran | Switch: 1 if Libradtran is run with inputfiles produced with makingfiles, 0 if off.                                                  |
| verbose           | Switch: 1 to produce an extra Libradtran output file, which includes the cloud optical thickness. This output file is called verbose |

## Output

| Name                         | Description                                                                                                                               |
|------------------------------|-------------------------------------------------------------------------------------------------------------------------------------------|
| table_clearsky_diffuse.txt   | Table with representative wavelengths for clear-sky diffuse radiation depending on SZA                                                    |
| band%s_wavelength_direct.txt | Table with representative wavelengths for clear-sky direct radiation depending on PW and SZA for every band (band number filled in at %s) |
| band%s_wavelength_cloudy.txt | Table with representative wavelengths for cloudy diffuse radiation depending on LWP and IWP for every band (band number filled in at %s)  |
| dirsum_table.txt             | Table with direct/total incoming shortwave radiation fraction                                                                             |

## time\_series.py

### Introduction and Purpose

The second script (time\_series.py) is a Python script and provides a code to conduct a time series for a grid point on the Greenland ice sheet for a whole year using RACMO2.3p2 output (the data set used in Van Dalum et al. (2019) can be found here: <https://doi.org/10.5281/zenodo.1468647>). Data are considered at the same moment every day (e.g 15:00 GMT, but other moments can be chosen as well). For these moments, TARTES is run using the conditions provided by RACMO2.3p2, and the representative wavelengths from the lookup tables produced with the SNOWBAL module. The results are then shown in a figure similar to Figure 12 from Van Dalum et al. (2019). The option to use the albedo scheme of Kuipers Munneke et al. (2011) and compare the results with TARTES, is also implemented. Some corrections for cloud thickness and the top snow layer are made. More information about the steps taken are found in the code. The script is built in Python2.7, but should also be compatible with Python3.7.

### Packages

tartes  
matplotlib  
os.path  
seaborn  
time  
numpy  
netCDF4  
scipy

### Input parameters

Default values of all parameters are found in the code.

| Name                | Description                                                                                                                     |
|---------------------|---------------------------------------------------------------------------------------------------------------------------------|
| datalocation        | Directory with RACMO data (in netcdf format), all data in this directory will be loaded                                         |
| lookuptablelocation | Directory with the lookup tables for RACMO                                                                                      |
| savedir             | Directory to save the results                                                                                                   |
| lwpthres            | LWP threshold. It is assumed that all radiation is cloudy diffuse beyond this value                                             |
| iwpthres            | IWP threshold. It is assumed that all radiation is cloudy diffuse beyond this value                                             |
| impcon              | Soot concentration in kg/kg (one value if constant, otherwise a value for all layers)                                           |
| ssabareice          | SSA of the bare ice, taken as a constant for all conditions                                                                     |
| wlbands             | Number of wavelength bands                                                                                                      |
| anglescs            | SZA of the look up table for clear sky conditions for Direct/total energy fraction (for example an array from 0 to 90 degrees). |
| angleswl            | SZA of the lookup table for wavelength determination of clear sky conditions for direct and diffuse.                            |
| iwplist             | Ice water path for the lookup table interpolation                                                                               |
| lwplist             | Liquid water path for the lookup table interpolation                                                                            |
| PW_list             | Precipitable water for the lookup table interpolation. Note that in RACMO, PW has the variable name var230.                     |
| lw                  | Linewidth for plots                                                                                                             |
| year                | Considered year                                                                                                                 |
| timegmt             | Time in GMT                                                                                                                     |
| latpoint            | Latitude element of the considered point (for latpoint = 46: 64.67 N)                                                           |
| lonpoint            | Longitude element of the considered point (for lonpoint = 40: 45.05 W)                                                          |
| pkm                 | Switch: 1 If the albedo according to Kuipers Munneke et al. (2011) is considered                                                |
| plot                | Switch: 1 If plots are made                                                                                                     |
| rhoice              | Density of ice (for PKM)                                                                                                        |
| albbareice          | Bare ice albedo (for PKM)                                                                                                       |
| monthlist           | List of the considered months                                                                                                   |
| monthlistabb        | List of the abbreviations of the months                                                                                         |
| monthselementen     | List of the amount days in the considered months                                                                                |
| lambdaclouds        | Array with representative wavelengths for cloudy conditions                                                                     |
| lambdadir           | Array with representative wavelengths for clear-sky direct radiation                                                            |
| lambdadif           | Array with representative wavelength for clear-sky diffuse radiation                                                            |
| dirsumfrac          | Direct/total energy fraction per band and as a function of SZA.                                                                 |

### Output

A figure with 8 panels (7 if PKM is turned off) as a function of time for the given year and moment of the day.

Panel 1. Surface downward SW radiation including total, UV + visible and IR, 2. Broadband albedo of TARTES, RACMO2, and PKM if PKM is turned on. The horizontal lines on the right indicate the broadband albedo 3.

Albedo difference: TARTES – RACMO2, 4. Albedo difference TARTES – PKM if PKM is turned on, 5. SZA, 6. Cloud cover, 7. 2-m Temperature with melt events indicated red, 8. SSA as a function of depth, including a horizontal line at the bottom, indicating the lack of a fresh snow layer.
